# Transpeptidase PBP2 governs initial localization and activity of major cell-wall synthesis machinery in *Escherichia coli*

Eva Wollrab<sup>1\*</sup>, Gizem Özbaykal<sup>1,2\*</sup>, Antoine Vigouroux<sup>1,3,4</sup>, Baptiste Cordier<sup>1</sup>, Francois Simon<sup>1</sup>, Thibault Chaze<sup>5</sup>, Mariette Matondo<sup>5</sup>, and Sven van Teeffelen<sup>1#</sup>

1. Morphogenesis and Microbial Growth Lab, Institut Pasteur, Paris, France
2. Université Paris Diderot, Sorbonne-Paris-Cité, Paris, France
3. Synthetic Biology Lab, Institut Pasteur, Paris, France
4. Université Paris Descartes, Sorbonne-Paris-Cité, Paris, France
5. Proteomics Platform, Institut Pasteur, Paris, France

\* These authors contributed equally to the work.

# Correspondence should be addressed to Sven van Teeffelen  
([sven.vanteeffelen@gmail.com](mailto:sven.vanteeffelen@gmail.com))

## 1 Abstract

2 Bacterial shape is physically determined by the peptidoglycan cell wall. The cell-wall-  
3 synthesis machinery responsible for rod shape in *Escherichia coli* is the processive 'Rod  
4 complex'. Previously, cytoplasmic MreB filaments were thought to govern formation and  
5 localization of Rod complexes based on local cell-envelope curvature. However, using  
6 single-particle tracking of the transpeptidase PBP2, we found strong evidence that PBP2  
7 initiates new Rod complexes by binding to a substrate different from MreB or any known  
8 Rod-complex component. This substrate is likely the cell wall. Consistently, we found only  
9 weak correlations between MreB and envelope curvature in the cylindrical part of cells.  
10 Residual correlations do not require any curvature-based Rod-complex initiation but can be  
11 attributed to persistent rotational motion. Therefore, local cell-wall architecture likely provides  
12 the cue for PBP2 binding and subsequent Rod-complex initiation. We also found that PBP2  
13 has a limiting role for Rod-complex activity, thus supporting its central role.

## 14 Introduction

15 The peptidoglycan (PG) cell wall is the major load-bearing structure of the bacterial cell  
16 envelope and physically responsible for cell shape (Vollmer et al., 2008). Rod-like cell shape  
17 in *Escherichia coli* and other rod-like model organisms requires peptidoglycan synthesis by  
18 stable multi-enzyme 'Rod complexes' containing the transglycosylase RodA, the  
19 transpeptidase PBP2, the transmembrane protein RodZ, and the actin homolog MreB (Cho  
20 et al., 2016; Emami et al., 2017; Meeske et al., 2016; Morgenstein et al., 2015; Typas et al.,  
21 2012). All of these proteins move persistently around the cell circumference at similar  
22 speeds (Cho et al., 2016; Morgenstein et al., 2015; van Teeffelen et al., 2011), suggesting  
23 that these proteins stably associate for processive cell-wall insertion. Colocalization of MreB

24 and RodZ (Alyahya et al., 2009; Bendezú et al., 2009; Morgenstein et al., 2015) supports  
25 this idea.

26 Other proteins (MreC, MreD, PBP1a, and PBP1b) are possibly also part of these complexes  
27 (Banzhaf et al., 2012; Cho et al., 2016; Contreras-Martel et al., 2017; Kruse et al., 2004;  
28 Morgenstein et al., 2015). MreC activates PBP2 (Contreras-Martel et al., 2017; Rohs et al.,  
29 2018). However, the shape defect of a *mreCD* deletion is partially suppressed by a  
30 hyperactive PBP2 point mutant (Rohs et al., 2018), suggesting that neither MreC nor MreD  
31 are strictly necessary for Rod-complex assembly or function. The bi-functional class-A  
32 penicillin-binding proteins PBP1a and PBP1b interact with PBP2 and RodZ, respectively  
33 (Banzhaf et al., 2012; Morgenstein et al., 2015), and PBP2 activates PBP1a  
34 glycosyltransferase activity *in vitro* (Banzhaf et al., 2012). However, Rod-complex rotational  
35 motion is independent of class-A PBP activity (Cho et al., 2016). Furthermore, single-  
36 molecule tracking suggests that any possible association of PBP1a or PBP1b with the Rod  
37 complex is short lived (Cho et al., 2016). Similar to *mreCD*, a *rodZ* deletion can also be  
38 suppressed by point mutations in PBP2, RodA, or MreB (Shiomi et al., 2008). Summarizing,  
39 it emerges, that RodA, PBP2, and MreB form the core of the Rod complex (Rohs et al.,  
40 2018). On the contrary, the determinants of Rod-complex spatial distribution and activity,  
41 which are ultimately responsible for cell shape, remain less well understood.

42 MreB filaments are intrinsically curved (Hussain et al., 2018; Salje et al., 2011). This  
43 curvature likely stabilizes the uniform circumferential or near-circumferential orientation of  
44 MreB filaments in the cylindrical parts of rod-shaped cells (Billaudeau et al., 2019; Hussain  
45 et al., 2018; Olshausen et al., 2013; Ouzounov et al., 2016; Wang and Wingreen, 2013),  
46 while uniform orientation is lost in aberrantly shaped cells (Hussain et al., 2018). MreB  
47 filaments are therefore likely responsible for the stable near-circumferential orientation of  
48 both Rod complex movement (Errington, 2015; Hussain et al., 2018) and the cell wall  
49 (Hussain et al., 2018; Wang et al., 2012). Computational simulations suggest that  
50 circumferential organization of the cell wall, in turn, contributes to mechanical integrity  
51 (Morgenstein et al., 2015; van Teeffelen et al., 2011) and maintenance of rod-like cell shape  
52 (Nguyen et al., 2015).

53 Previously, it has been suggested that MreB filaments provide a platform that recruits other  
54 Rod-complex components to the site of future cell-wall synthesis (Errington, 2015; Shi et al.,  
55 2018; Surovtsev and Jacobs-Wagner, 2018). Accordingly, MreB filaments might be  
56 responsible for the initial localization of Rod complexes. Ursell et al. and others suggested  
57 that MreB filaments are attracted to sites of specific two-dimensional cell-envelope curvature  
58 (Billings et al., 2014; Shi et al., 2018; Ursell et al., 2014) based on mechanical properties of  
59 MreB filaments and RodZ-MreB interactions (Bratton et al., 2018; Colavin et al., 2018).  
60 However, correlations could also come about indirectly, for example through a curvature-  
61 independent depletion of MreB from highly curved cell poles (Kawazura et al., 2017) or

62 through persistent motion (Hussain et al., 2018; Wong et al., 2017, 2019). Therefore, the  
63 initial localization of Rod complexes could in principle be governed by factors different from  
64 MreB. We thus wondered, whether the cell wall itself could provide a local cue for the  
65 initiation of Rod complexes, independently of cell-envelope curvature. Such a local cue  
66 would have to be sensed by a protein with a periplasmic domain that can possibly bind the  
67 cell wall.

68 An obvious candidate is the transpeptidase PBP2. For its cross-linking activity PBP2 must  
69 bring together donor peptides on nascent glycan strands and acceptor peptides in the cell  
70 wall. Binding of PBP2 to the existing cell wall could therefore provide an alternative  
71 mechanism of Rod-complex initiation. In support of this hypothesis, a PBP2(L61R) mutant  
72 shows increased cell-wall synthetic activity and affects the distribution of MreB-actin filament  
73 length (Rohs et al., 2018). Further support comes from localization studies in *Caulobacter*  
74 *crescentus*: There, the spatial distributions of PBP2 and MreB only partially overlap, which is  
75 compatible with the hypothesis that PBP2 finds sites for activity independently of MreB (Dye  
76 et al., 2005; Hocking et al., 2012).

77 Here, we used single-molecule tracking to demonstrate that diffusive PBP2 molecules stably  
78 bind to an immobile and non-saturating component in the cell envelope. Bound molecules  
79 transition between immobile and persistently moving states, the latter depending on Rod-  
80 complex activity. Interestingly, MreB filaments are not the binding substrate for PBP2, nor  
81 does MreB determine locations of PBP2 binding. Other known Rod-complex components  
82 are likely also not required. A high degree of residual persistent motion upon RodA  
83 repression suggests that PBP1a or a different transglycosylase can contribute to processive  
84 Rod-complex activity (Banzhaf et al., 2012).

85 Our major observation let us conclude that PBP2 determines the initial localization of newly  
86 forming Rod complexes, possibly by binding to the cell wall directly. In support of this  
87 conclusion, we found that MreB filaments are likely not recruited to regions of particular cell-  
88 envelope curvature in filamentous and normal cells, contrary to (Ursell et al., 2014).  
89 Specifically, we found only weak MreB-curvature correlations once cell poles were excluded  
90 from the analysis. Residual correlations were attributed to weak spontaneous cell bending,  
91 suggesting that they are caused by persistent rotational motion (Wong et al., 2017). Finally,  
92 we also found that fast diffusing molecules cannot contribute to processive Rod-complex  
93 activity due to limitations of diffusion, contrary to (Lee et al., 2014).

## 94 Results

### 95 ***PBP2 enzymes can be quantitatively separated into diffusive and bound fractions***

96 To study the role of PBP2 for the formation of Rod complexes we characterized its different  
97 states of motion, which are potentially representative of different states of substrate binding  
98 and activity. We imaged a functional, N-terminal protein fusion of the photo-activatable  
99 fluorescent protein PAmCherry to PBP2 (Lee et al., 2014). The fusion is expressed from the  
100 native *mrdA* locus at a level similar to the wild-type protein according to quantitative mass  
101 spectrometry (Fig. 1–SI Fig. 1D) and Bocillin labeling experiments [Fig. 1–SI Fig. 1A and  
102 also (Lee et al., 2014)]. The strain carrying the fusion maintains rod-like cell shape with only  
103 slight deviations of average cell diameter and length (Fig. 1–SI Fig. 1B) and does not show  
104 any growth defect (Fig. 1–SI Fig. 1C) (Lee et al., 2014).

105 We obtained single-molecule tracks by single-particle tracking *PhotoActivatable Localization*  
106 *Microscopy* (sptPALM) (Manley et al., 2008) in total internal reflection fluorescence (TIRF)  
107 mode, which restricts the observation to the bottom part of the cell. We first imaged PBP2  
108 molecules at high frequency (intervals of 60 ms). We found both spatially extended  
109 trajectories, corresponding to fast diffusing molecules, and trajectories that appeared as  
110 localized, corresponding to immobile or slowly moving molecules (Fig. 1A, Fig. 1–Movie 1).  
111 We confirmed the presence of two distinct fractions of diffusing and localized molecules  
112 based on the distribution of single-track effective diffusion constants (Fig. 1B). More  
113 specifically, the experimental distribution was fit to the prediction from a two-state diffusion  
114 model, which contains as a special case a diffusing and an immobile population (Fig. 1B;  
115 Fig. 1–SI Fig. 2). We found a population with diffusion constant  $D_1 = 0.039 \pm 0.002 \mu\text{m}^2/\text{s}$   
116 containing  $19 \pm 2\%$  of all enzymes, and a second population with zero diffusion constant  
117 containing  $81 \pm 2\%$  of all molecules.

118 The relative sizes of the two populations are only weakly affected by PBP2 expression level:  
119 Upon overexpressed by about three- to six-fold (Fig. 1–SI 1D) using the vector pKC128 that  
120 expresses PAmCherry-PBP2 from the native *mrdAB* promoter (Lee et al., 2014) the fraction  
121 of molecules with near-zero diffusion constant decreased only mildly from 20% to 15%  
122 (Fig. 1H-I and Fig. 1–SI Fig. 3).

123 While the diffusing molecules are likely enzymatically inactive and possibly searching for  
124 new sites of cell-wall insertion (see further down), the localized molecules are therefore likely  
125 bound to an immobile and non-saturated substrate or part of slowly moving Rod complexes  
126 with anticipated speeds of 10-40 nm/s (Cho et al., 2016; van Teeffelen et al., 2011).

127 ***Bound PBP2 molecules are either persistently moving or immobile***

128 To test whether all or part of the bound molecules were moving persistently we imaged  
129 PBP2 molecules at low frequency, taking images with an exposure time of 1 s and intervals  
130 of 3.6 s. The long exposure time effectively smears out the fluorescence of fast diffusing  
131 molecules, allowing us to detect the positions of individual bound molecules. Using this  
132 protocol, we found molecules that moved persistently, were immobile, or showed transitions  
133 between these two states (Fig. 1C-E, Fig. 1–Movie 2, and Fig. 1–SI Fig. 4).

134 Persistently moving molecules showed similar distributions of speed and orientation as a  
135 functional msfGFP-MreB fusion (Ouzounov et al., 2016) expressed from the native *mreB*  
136 locus (Fig. 1F, G) (Cho et al., 2016)], in agreement with previous measurements (Cho et al.,  
137 2016; van Teeffelen et al., 2011). For accurate velocity measurements, we obtained these  
138 results from movies acquired with a shorter time interval of 1 s. Straight tracks representing  
139 persistently moving molecules were selected based on the mean squared displacements  
140 (MSD) (Fig. 1–SI Fig. 5).

141 Because PBP2 molecules show transitions between different states in single trajectories, we  
142 quantified immobile and persistent states locally in time. Specifically, we classified motion  
143 states using a threshold on the mean velocity during four consecutive time steps in movies  
144 acquired with 3.6 s interval (Fig. 1C-E). Window size and velocity threshold (8 nm/s) were  
145 chosen based on computationally simulated tracks (Fig. 1–SI Fig. 6A-C). In confirmation of  
146 our two-state model, we found good agreement between the average MSD obtained from  
147 experiment and simulation for immobile and persistent segments, respectively (Fig. 1–SI  
148 Fig. 6D-F). Other states of motion are therefore likely not present. Using this criterion we  
149 found a persistent fraction of  $42.2 \pm 1.1$  % of all bound molecules, while  $57.8 \pm 1.1$  %  
150 remained immobile (Fig. 1H).

151 Upon overexpression of PAmCherry-PBP2 as above, we found that the persistent fraction  
152 remained nearly constant (Fig. 1H). This finding suggests that PBP2 limits the number of  
153 active Rod complexes. This viewpoint is consistent with the recent report that a hyperactive  
154 PBP2 point mutant (L61R) increased the overall amount of active Rod complexes (Rohs et  
155 al., 2018). We will come back to this mutant below.

156 ***msfGFP-PBP2 fusion confirms findings and demonstrates increased PBP2 binding***  
157 ***upon PBP2 depletion***

158 We confirmed our findings using a strain that carries a functional msfGFP-PBP2 fusion  
159 under IPTG-inducible control as the sole copy of PBP2 (Cho et al., 2016). We chose the  
160 induction level (25  $\mu$ M IPTG) based on measurements of cell diameter (Fig. 1–SI Fig. 7A).  
161 Noteworthy, quantitative mass spectrometry showed levels of msfGFP-PBP2 to be about

162 three-fold higher than native PBP2 in the wild type (Fig. 1–SI Fig. 7B), while near-wild-type  
163 levels observed at lower induction (5  $\mu$ M IPTG) led to loss of rod shape at long times  
164 (Fig. 1–SI Fig. 7A). This discrepancy might be a consequence of reduced enzymatic  
165 efficiency of the msfGFP fusion or simply due to the more noisy expression from the  
166 inducible promoter.

167 Tracking the msfGFP-PBP2 at high frequency after initial pre-bleaching, we found a similar  
168 fraction of bound PBP2 molecules ( $23.2 \pm 9.2$  %) (Fig. 1–SI Fig. 7C, Fig. 1–Movie 3).  
169 Similarly to PAmCherry-PBP2, the bound fraction was reduced only slightly upon two-fold  
170 increase of protein levels ( $18 \pm 6.1$  %), supporting our previous conclusion that the target of  
171 PBP2 binding is non-saturated.

172 Among the bound molecules we found a fraction of  $80 \pm 10$  % persistently moving molecules  
173 (Fig. 1–SI Fig. 8A, Fig. 1–Movie 4), which is significantly higher than in the case of the  
174 PAmCherry fusion. However, similarly to the PAmCherry fusion, the persistent fraction  
175 remained nearly constant over the 6-fold range of expression levels, only showing a mild  
176 drop at the highest induction level of 100  $\mu$ M IPTG (Fig. 1–SI Fig. 8A). These results  
177 therefore confirm that the binding target of PBP2 is non-limiting and that PBP2 actively limits  
178 Rod-complex activity.

179 Interestingly, the bound fraction increased almost two-fold after long times of low expression  
180 levels (5  $\mu$ M) (Fig. 1–SI Fig. 9B), already before rod shape had been lost (Fig. 1–SI Fig. 9A).  
181 This observation suggests a potential feedback mechanism between cell-wall architecture  
182 due to reduced Rod-complex activity and PBP2 binding. We will come back to this point  
183 further down.

#### 184 ***A hyperactive PBP2 mutant (L61R) shows increased binding at low expression***

185 Initially intended as a further test of our method, we also tracked an msfGFP fusion to the  
186 PBP2 point mutant (L61R) recently characterized by (Rohs et al., 2018). Based on slow-  
187 frequency imaging, they reported that the number of bound msfGFP-PBP2(L61R) was about  
188 two-fold increased as compared to msfGFP-PBP2 (Rohs et al., 2018). We confirmed this  
189 finding quantitatively (Fig. 1–SI Fig. 7C). However, we also found that the bound fraction  
190 was high only at low protein expression (5  $\mu$ M IPTG), while it was equal to the bound fraction  
191 of the wild-type protein at higher expression (25  $\mu$ M IPTG). Furthermore, the persistent  
192 fraction was reduced in comparison to the wild-type protein (Fig. 1–SI Fig. 8A). Therefore,  
193 the mutant shows higher activity at low expression as previously reported but reduced  
194 activity at higher expression.

## 195 ***PBP2 molecules show long persistent runs***

196 The classification into different motion states at the sub-trajectory level allowed us to extract  
197 average transition rates between immobile and persistently moving states,  $k_{ip}$  and  $k_{pi}$ ,  
198 respectively (Fig. 2A-B). Depending on the fluorescent-protein fusion, we found values of  $k_{ip}$   
199 between 0.015-0.06 s<sup>-1</sup>, and of  $k_{pi}$  between 0.006-0.02 s<sup>-1</sup>. The msfGFP-PBP2 fusion shows  
200 less frequent arrests and faster transitions from immobile to persistently moving states, in  
201 agreement with its higher fraction of moving molecules (Fig. 1–SI Fig. 8A).

202 A persistent run of PBP2 terminates either due to an arrest of PBP2 (persistent-to-immobile  
203 transition) or due to an unbinding event (persistent-to-diffusive transition). As an upper  
204 bound of the unbinding rate, we measured the transition rate from the aggregate bound state  
205 (persistent and immobile states) to the diffusive state,  $k_{bd}$  (Fig. 1A). Specifically, we acquired  
206 distributions of track lengths for two different imaging intervals of 1 s and 12 s (Fig. 2C),  
207 using the msfGFP-PBP2 fusion for the higher number of tracks obtained. Track length is  
208 limited by bleaching, unbinding, and persistent molecules leaving the field of view. The latter  
209 two processes are responsible for the shorter track lengths observed for  $dt = 12$  s. Taking all  
210 three processes into account in computational simulations, we obtained an upper limit of the  
211 unbinding rate of  $k_{bd} < 0.03$  s<sup>-1</sup>, corresponding to a minimum average lifetime of 30 s (Fig. 2–  
212 SI Fig. 1).

213 The rates  $k_{pi}$  and  $k_{bd}$  then yield the possible ranges of average run lengths of persistently  
214 moving molecules between 0.3-1.6  $\mu$ m, depending on protein fusion and exact unbinding  
215 rate. This range is compatible with long tracks of MreB motion observed previously (van  
216 Teeffelen et al., 2011).

## 217 ***PBP2 spatial pattern and bound fraction are independent of MreB cytoskeleton***

218 MreB is often regarded as a hub for Rod-complex components (Errington, 2015; Shi et al.,  
219 2018; Surovtsev and Jacobs-Wagner, 2018). To determine whether MreB is the substrate of  
220 PBP2 binding we treated cells with the putative MreB-polymerization inhibitor A22 (Gitai,  
221 2005). A22 treatment strongly reduced both number and size of MreB-msfGFP spots  
222 observed on the two-dimensional cell contour using epi-fluorescence microscopy (Fig. 3A,  
223 Fig. 3–SI Fig. 1A) and abolished rotational motion (Fig. 3–Movies 1-2).

224 To test whether MreB filaments were required for PBP2 binding we first imaged the spatial  
225 distribution of an mCherry-PBP2 fusion on the cell contour in untreated or A22-treated  
226 conditions, in the same manner as we imaged MreB-msfGFP (Fig. 3B, Fig. 3–SI Fig. 1B).  
227 We found that mCherry-PBP2 showed a spotty pattern. Since these images were taken with  
228 a long exposure time (1s), each spot likely represents multiple bound molecules. Different  
229 from MreB-msfGFP, the spotty pattern of mCherry-PBP2 was not affected by A22 treatment  
230 (Fig. 3C) – a strong indication that MreB filaments are not the binding substrate for PBP2.

231 Next, we measured bound and persistent fractions of PBP2 molecules before and after A22  
232 treatment using single-molecule tracking in TIRF. The bound fraction remained close to the  
233 value of untreated cells (Fig. 3E). Yet, the apparent fraction of persistently moving molecules  
234 among all bound PBP2 enzymes nearly vanished (Fig. 3F). This is consistent with the arrest  
235 of MreB rotation (Fig. 3–Movie 2) and with previous bulk measurements of Rod-complex  
236 activity (Uehara and Park, 2008). To follow the bound fraction during two mass-doubling  
237 times (Fig. 3E), we used an intermediate concentration of A22 (20  $\mu$ M), which did not affect  
238 growth (Fig. 3–SI Fig. 2A). Together, our findings suggest that MreB polymers are neither  
239 the substrate of PBP2 binding nor do they affect the rate of PBP2 binding and unbinding.

240 MreB depolymerization did also not elicit a rapid change of the diffusion constant of the  
241 freely diffusing molecules (Fig. 3E), suggesting that MreB does not significantly constrain the  
242 movement of diffusive PBP2 molecules to an area close to the MreB cytoskeleton (Strahl et  
243 al., 2014). Therefore, if PBP2 binds its substrate from the diffusive state, the locations of  
244 PBP2 binding are also independent of MreB.

245 A22 treatment already demonstrates that PBP2 binding is independent of Rod-complex  
246 activity. We confirmed this finding using the PBP2-targeting beta-lactam Mecillinam, which  
247 binds covalently to the active site (Spratt, 1975). Mecillinam did not cause a reduction of the  
248 bound fraction (Fig. 3E), demonstrating that PBP2 binds its binding target with a moiety  
249 different from its active site.

250 At long times of treatment with Mecillinam or A22 (120 min) the bound fraction increased  
251 and the diffusion constant decreased (Fig. 3E), which coincides and is potentially caused by  
252 the loss of normal cell-wall architecture during loss of rod-like cell shape (Fig. 3–SI Fig. 2C),  
253 similar to the increase of the bound fraction at sustained low induction levels of msfGFP-  
254 PBP2 (Fig. 1–SI Fig. 9B).

### 255 ***PBP2 binds to its substrate at locations that are independent of MreB localization***

256 To demonstrate that PBP2 binding was indeed independent of MreB filaments or Rod-  
257 complex activity as suggested by Fig. 3 we still needed to show that PBP2 molecules  
258 interchange between diffusive and bound states during A22 treatment. We already found a  
259 low upper bound for the transition rate from bound to diffusive states in non-treated cells ( $k_{bd}$   
260  $< 0.03 \text{ s}^{-1}$ ) (Fig. 2C), and we expect inverse transitions to occur even more rarely. We  
261 therefore used a variant of Fluorescence Recovery After Photobleaching (FRAP) (Fig. 4A)  
262 termed Bound-Molecule FRAP: Instead of measuring fluorescence intensity we measure the  
263 bound fraction at different time points after bleaching almost all molecules at the bottom of  
264 the TIR field of view. Right after bleaching, the bound fraction dropped significantly (Fig. 4B),  
265 suggesting that fast diffusing molecules re-entered the observation window within less than  
266 half a minute but did not quickly bind their substrate. Within about 2-4 min the bound fraction



267 recovered, yielding a transition rate from diffusive to bound states of  $k_{db} = (4.5 \pm 2) \cdot 10^{-3} \text{ s}^{-1}$ .  
268 The same experiment in non-treated cells did not reveal recovery of the bound fraction  
269 (Fig. 4–SI Fig. 1), presumably because bound molecules left the field of view through  
270 persistent motion.

271 Since the bound and diffusive fractions did not change by more than 10% after A22  
272 treatment, transition rates from the diffusive into the bound states must be matched by  
273 reverse transitions from the bound to the diffusive state with a rate  $k_{bd} = k_{db}(1-b)/b =$   
274  $0.02 \pm 0.01 \text{ s}^{-1}$ , where  $b$  is the bound fraction. We confirmed this expectation through  
275 independent lifetime measurements of A22-treated cells, similar to those in Fig. 2 (Fig. 4C),  
276 yielding  $k_{bd} = 0.018 \pm 0.01 \text{ s}^{-1}$ . Since bound fractions are almost identical for untreated and  
277 A22-treated cells, we reasoned that binding and unbinding rates  $k_{bd}$  and  $k_{db}$  are likely also  
278 the same in both conditions.

279 The average lifetime of a bound molecule of about 1 min is 70-fold smaller than the cell  
280 doubling time of 70 min (Fig. 1–SI Fig. 1C). Therefore, almost all bound PBP2 molecules  
281 observed at any time have undergone multiple transitions from the diffusive to their current  
282 bound state. Together with the previous observation that free diffusion is not constrained by  
283 MreB filaments we can thus conclude that PBP2 binds its substrate at locations that are  
284 determined independently of MreB filaments.

### 285 ***PBP2 determines the location of new Rod complexes***

286 Two qualitatively different scenarios for the formation of an active Rod complex are  
287 conceivable, once PBP2 has bound to a location in the cell envelope: First, MreB filaments  
288 could join PBP2 *after* PBP2 binding (through diffusion and capture or through nucleation;  
289 Fig. 4D). Alternatively, by chance, MreB filaments could already be present at the PBP2-  
290 binding site *prior* to PBP2 binding (however, without actively influencing the sites of PBP2  
291 binding itself, as shown in the previous paragraph).

292 Since MreB filaments cover only a small area fraction of the cytoplasmic membrane [about  
293 2% according to a conservative estimate (Methods)], the latter scenario would require that a  
294 single PBP2 molecule bound and unbound unsuccessfully more than 50 times before finding  
295 an MreB filament by chance. With the binding and unbinding rates measured it would take  
296 an initially diffusing molecule about 200 minutes to become part of an active rod complex,  
297 which makes this scenario highly unlikely. Therefore, we suggest that PBP2 binds to a site in  
298 the cell envelope and then recruits MreB filaments (Fig. 4D). Thus, PBP2 determines the  
299 locations of newly forming Rod complexes.

300 ***PBP2-binding substrate is none of the known Rod-complex components but likely the***  
301 ***cell wall***

302 Proteins different from MreB could still provide the binding substrate or be required for  
303 binding – specifically the putative Rod-complex components MreC, MreD, RodA, RodZ, and  
304 PBP1a. We therefore constructed depletion strains for RodA, RodZ, or MreCD in a  
305 background strain expressing either native levels of PAmCherry-PBP2 (for RodZ, MreCD) or  
306 overexpressing PAmCherry-PBP2 (for RodA). Without repression, all of the strains showed  
307 normal growth rate (Fig. 5–SI Fig. 1), cell shape (Fig. 5A, Fig. 5–SI Fig. 2), bound fractions  
308 (Fig. 5C), and persistent fractions (Fig. 5D). Only the RodZ-depletion strain showed slightly  
309 higher bound and persistent fractions.

310 Within 3-5 h after depletion, cells started to lose their rod-like shape (Fig. 5–SI Fig. 2). After  
311 growing cells for about two additional doubling times (according to OD), we measured bound  
312 and persistent fractions (Fig. 5C-D). At this point, repressed protein levels were reduced well  
313 below wildtype levels according to mass spectrometry (Fig. 5–SI Fig. 3A) and cell shape was  
314 severely perturbed (Fig. 5B, Fig. 5–SI Fig. 2) while growth rate remained unperturbed  
315 (Fig. 5–SI Fig. 1). PBP2 levels remained close to native levels during all experiments except  
316 for RodA depletion, where PBP2 remained overexpressed (Fig. 5–SI Fig. 3B).

317 Upon depletion of either RodA or MreCD the bound fraction remained constant, while the  
318 persistent fraction markedly dropped. These findings suggest that RodA or MreCD are  
319 important for Rod-complex activity but that they are neither required for PBP2 binding nor do  
320 they affect the rates of PBP2 binding or unbinding.

321 Different from RodA and MreCD, depletion of RodZ led to a significant reduction of the  
322 bound fraction 6 h after starting depletion, while the persistent fraction remained high.  
323 Noteworthy, the reduction of persistent motion (the product of persistent and bound  
324 fractions) of about two-fold is compatible with independent measurements of the density of  
325 persistently moving MreB filaments (Dion et al., 2019). When measuring the bound fraction  
326 upon RodZ depletion over time, we found that the drop already occurred within about two  
327 hours (Fig. 5–SI Fig. 4), suggesting that RodZ might modulate the rates of PBP2 binding or  
328 unbinding. However, after 6 h of depletion, the bound fraction started to increase steadily,  
329 demonstrating that RodZ is not strictly required for PBP2 binding.

330 To test whether RodZ might influence the location of PBP2 binding we measured the degree  
331 of co-localization of mCherry-PBP2 and RodZ-GFP along the contour of cells expressing  
332 both fusions as sole copies of the respective proteins (Fig. 6A-C, Fig. 6–SI Fig. 1). PBP2  
333 and RodZ did only show weak or no visible co-localization, which was also reflected by low  
334 Pearson's correlation coefficients measured in single cells (Fig. 6D). In contrast, correlations  
335 between RodZ-GFP and MreB-mCherry were always high and positive (Fig. 6B-D, Fig. 6–SI  
336 Fig. 1) as expected (Alyahya et al., 2009; Morgenstein et al., 2015). As an additional test we

337 also studied the density of RodZ-GFP peaks upon treatment with A22 (Fig. 6E-F). We found  
338 that the pattern of RodZ changed in a similar manner as the pattern of MreB-msfGFP  
339 (Fig. 3), while mCherry-PBP2 did not (Fig. 3), suggesting that the spatial pattern of RodZ  
340 depends on MreB (Bendezú et al., 2009), while the spatial pattern of PBP2 binding is  
341 independent of both MreB and RodZ.

342 Qualitatively similarly to the effect of *rodZ* depletion, a *ponA* deletion strain (*ponA* codes for  
343 PBP1a) (Fig. 5) did not eliminate PBP2 binding but showed a drop of the bound fraction.  
344 Therefore, PBP1a is not required for PBP2 binding but might aid PBP2 binding or stabilize  
345 bound PBP2.

346 Our experiments suggest that none of the putative Rod-complex components are required  
347 for PBP2 binding or influence the spatial pattern of PBP2 binding. We therefore reasoned  
348 that PBP2 binds to the cell wall directly. Further support for this viewpoint comes from the  
349 diffusive motion of PBP2 molecules. PBP2 diffusion is much slower than diffusion of similar-  
350 size membrane proteins (Kumar et al., 2010) or of a truncated version of PBP2 (Lee et al.,  
351 2014), suggesting that PBP2 might weakly bind the cell wall even during diffusion. We found  
352 that depletion of RodA, RodZ, and MreCD caused an additional decrease of the diffusion  
353 constant (Fig. 5–SI Fig. 5), similarly to long-term treatment with A22 or Mecillinam (Fig. 3E).  
354 In all these experiments Rod-complex activity is inhibited or reduced, which changes cell-  
355 wall architecture (Wang et al., 2012) and reduces the degree of cross-linking (Uehara and  
356 Park, 2008). We therefore reasoned that diffusion is likely governed by the physical  
357 interactions between PBP2 and the cell wall (Lee et al., 2014), supporting the idea that  
358 PBP2 can bind the cell wall directly, through a domain that is different from its enzymatically  
359 active site.

### 360 ***MreB-curvature correlations are likely the result of persistent motion***

361 Previously, Ursell et al. observed that MreB filaments were excluded from regions of positive  
362 Gaussian cell-envelope curvature such as found at the cell poles, while MreB was enriched  
363 in regions of negative Gaussian curvature as found at the inner sides of bent cells (Ursell et  
364 al., 2014). They concluded that the locations of Rod-complex activity are determined by  
365 MreB filaments preferentially localizing to sites of negative Gaussian curvature in rod-  
366 shaped cells (Ursell et al., 2014). This conclusion is in contradiction to our finding that PBP2  
367 is responsible for the initial localization of new Rod complexes in the cylindrical part of the  
368 cell. However, MreB-curvature correlations could also come about indirectly through  
369 persistent rotational motion (Hussain et al., 2018; Wong et al., 2017, 2019) or additional  
370 mechanisms of polar exclusion (Kawazura et al., 2017), without any curvature-based Rod-  
371 complex initiation. To resolve this conflict, we reinvestigated MreB-curvature correlations  
372 and their potentially different origin.

373 We followed a very similar approach to (Ursell et al., 2014). Specifically, we measured the  
374 spatial pattern of MreB-msfGFP (Ouzounov et al., 2016) on the two-dimensional cell contour  
375 (Fig. 7A,B) both in filamentous cells, through expression of the division inhibitor SulA (Bi and  
376 Lutkenhaus, 1993), and in non-filamentous cells growing on agarose pads under the  
377 microscope. We obtained the contour curvature of the cell from phase-contrast images using  
378 the Morphometrics cell segmentation tool (Ursell et al., 2017, 2014). In cylindrical regions of  
379 normally growing or filamentous cells with low variations of cell diameter  $\sigma$ , contour  
380 curvature  $\kappa$  is a good proxy for Gaussian curvature  $G$ , with  $G = 2\kappa/\sigma$ .

381 First, we measured the enrichment of MreB intensity at the cell contour as a function of local  
382 contour curvature, just like (Ursell et al., 2014) (Fig. 7C for filamentous cells; Fig. 7–SI Fig. 1  
383 for wild-type cells). In quantitative agreement with their data we found enrichment of MreB at  
384 negative curvature and depletion at positive curvatures, as present at cell poles.

385 We then constrained our analysis to the cylindrical part of the cells and found that  
386 correlations were reduced by about five-fold at positive curvature values (Fig. 7C). These  
387 findings demonstrate that the pattern of MreB localization is not simply a function of contour  
388 or Gaussian curvature. Instead, curvature correlations are qualitatively different at different  
389 parts of the cell and dominated by cell poles. On the contrary, correlations between MreB  
390 and contour curvature in the cylindrical part of the cell are weak.

391 In previous work by some of us (Wong et al., 2017) we found small but significant  
392 correlations between MreB and cell-centerline curvature in mechanically bent cells. We  
393 therefore wondered whether residual correlations between MreB and contour curvature in  
394 the cylindrical part of the cell observed here were dominated by weak cell bending (Fig. 7A)  
395 likely caused by cells attaching to the glass surface (Duvernoy et al., 2018). To that end we  
396 restricted our analysis to regions of the cell, where the spatially filtered cell centerline (using  
397 a Gauss filter of  $\sigma = 80$  nm) was nearly straight (Fig. 7A). These regions still showed  
398 variations of cell-envelope curvature due to bulges or indentations (Fig. 7F). However, we  
399 did not find any significant correlations between MreB and contour curvature (Fig. 7D).  
400 Therefore, all residual MreB-curvature correlations after removal of poles and septa can be  
401 attributed to weak cell bending, while bending-independent bulges and indentations do not  
402 affect MreB localization.

403 We confirmed our findings with two alternative approaches: First, we subtracted from the  
404 local contour curvature the curvature contribution due to cell bending (Fig. 7–SI Fig. 2A-B).  
405 Residual curvature fluctuations originate from bulges or indentations. Consistently with our  
406 observation in straight cell segments, we found no significant correlations between MreB  
407 and corrected contour curvature. In an independent approach, we corrected MreB intensity  
408 values along the contours for the effect expected from cell-centerline bending (Fig. 7–SI  
409 Fig. 2C). Again, we did not find residual correlations after correction. Both of these analyses  
410 therefore strongly support the conclusion that spontaneous cell bending is responsible for all

411 correlations between MreB and contour curvature in the cylindrical parts of normally growing  
412 cells.

413 Previously, we demonstrated that a small bending-induced enrichment of MreB can be  
414 explained by persistent rotational motion of MreB filaments (Wong et al., 2017), because  
415 rotating MreB filaments tend to accumulate at inner regions of bent cells. Our observations  
416 are therefore compatible with a model of MreB-independent initiation of Rod complexes  
417 through PBP2.

#### 418 ***Diffusing PBP2 molecules do not contribute to Rod-complex activity***

419 It was previously suggested that diffusive PBP2 molecules contribute to cell-wall synthesis  
420 (Lee et al., 2014). However, if diffusive PBP2 molecules indeed contributed to processive  
421 Rod-complex activity, any cross-linking site of a moving Rod complex would have to be  
422 found by independent PBP2 molecules through diffusion at a rate equal to the cross-linking  
423 rate of up to 15/s. This rate corresponds to the distance between cross links of 2 nm  
424 (Meroueh et al., 2006) and a speed of PBP2 of 30 nm/s frequently observed (Fig. 1F).

425 To test whether PBP2 diffusion was fast enough for the biological cross-linking rate, we  
426 conducted computational simulations of freely diffusing PBP2 molecules and measured the  
427 average encounter rate between any simulated molecule and a given target site  
428 representing a Rod complex (Fig. 8A, B). We found that the rate between encounters was at  
429 least three times lower than the rate of cross-linking, even if a single enzyme had a high  
430 chance of returning to the same site and conduct multiple cross-linking reactions on average  
431 (Fig. 8C). Therefore, free diffusion cannot account for physiological cross-linking rates.

432 As an extension of the model we considered the possibility that PBP2 molecules underwent  
433 facilitated diffusion by preferentially diffusing along MreB filaments, which could possibly  
434 serve to increase encounter rates between PBP2 and cell-wall-insertion sites. One-  
435 dimensional diffusion along filaments indeed increased the encounter rate (Fig. 8D).  
436 However, due to the preferentially circumferential orientation of MreB filaments, facilitated  
437 diffusion would also lead to reduced and asymmetric diffusion (Fig. 8E). On the contrary, we  
438 did not observe asymmetric diffusion in our experiments (Fig. 8F). Therefore, Rod-complex  
439 activity requires the stable association between transglycosylase and transpeptidase for  
440 multiple cross-linking events. Our findings suggest, that only the persistently moving fraction  
441 of PBP2 molecules substantially contributes to cross-linking.

## 442 **Discussion**

443 In summary, we found a dominant role of PBP2 for Rod-complex initiation and persistent  
444 cell-wall synthetic activity. New Rod complexes are initiated by PBP2 binding to an immobile

445 substrate that is different from any known Rod-complex component and likely the cell wall.  
446 While MreB filaments are required for Rod-complex motion, they have no influence on the  
447 initial location of PBP2 binding. Therefore, PBP2 determines the location of newly forming  
448 Rod complexes independently of MreB and likely independently of all other known Rod-  
449 complex components.

450 It has been proposed that Rod complexes are recruited to sites of specific cell-envelope  
451 curvature based on mechanical properties of MreB (Ursell et al., 2014). We found that  
452 correlations between MreB filaments and cell-envelope curvature in normally growing rods  
453 do not require any curvature-dependent initiation of Rod complexes. This observation does  
454 not rule out that MreB-curvature correlations in cells of strongly perturbed shape might be  
455 influenced by MreB-filament bending or twisting (Bratton et al., 2018; Colavin et al., 2018).  
456 Evidence for motion-independent curvature preferences comes from *C. crescentus* (Harris et  
457 al., 2014). However, our study as well as previous studies (Hussain et al., 2018; Wong et al.,  
458 2017, 2019) suggest that MreB-filament rotation around the circumference are responsible  
459 for MreB-curvature correlations in wild-type and filamentous cells. Therefore, the physical  
460 signal underlying the spatial pattern of new Rod complexes is likely found in the local  
461 architecture of the cell wall, and not, as previously suggested, in the geometry of the  
462 cytoplasmic membrane.

463 We found that the bound fraction of PBP2 molecules remained nearly constant upon A22 or  
464 Mecillinam treatment (Fig. 3). We thus reasoned that persistently moving and immobile  
465 molecules are likely bound to the same substrate. In Gram-negative *E. coli* active Rod  
466 complexes are thought to insert nascent glycan strands in between template strands (Höltje,  
467 1998), even if deviations from perfect alignment are reported (Turner et al., 2018). During  
468 cell-wall insertion, Rod complexes might therefore stay connected to the local cell wall  
469 through associations between PBP2 and a template strand, independently of enzymatic  
470 activity. In the future, it will be interesting to study potential interactions at the molecular  
471 level. These might then also reveal structural features of the cell wall potentially responsible  
472 for stable PBP2 association.

473 PBP2 molecules transition only slowly between bound and diffusive states (Fig. 2). Possibly,  
474 PBP2 is found in two different molecular states that facilitate stable binding or allow for  
475 diffuse motion – either through conformational change or through interaction with an  
476 unknown interaction partner. Here, we demonstrated that depletion of RodA or MreC and  
477 MreD did not reduce the bound fraction of bound PBP2 molecules despite pronounced  
478 effects on cell shape, suggesting that RodA, MreC, and MreD have no major role on PBP2  
479 binding or on stabilizing bound PBP2. RodZ depletion, on the contrary, showed a reduction  
480 of the bound fraction, suggesting that RodZ directly modulates PBP2 binding or the stability  
481 of the bound form of PBP2. This is compatible with previous observations of RodZ-PBP2

482 interactions (Bendezú et al., 2009; Morgenstein et al., 2015). In the future, it will be  
483 interesting to investigate the role of RodZ for PBP2 binding or unbinding in more detail.

484 How do MreB filaments 'find' bound PBP2 molecules? MreB filaments are generally thought  
485 to move slowly. However, small filaments might also undergo rapid diffusive motion  
486 previously overlooked. Alternatively, PBP2 – either alone or together with other Rod-  
487 complex components such as RodZ – could nucleate new MreB filaments. This latter  
488 hypothesis is supported by the recent observation that the hyperactive PBP2(L61R) mutant  
489 described above causes more and shorter MreB filaments (Rohs et al., 2018).

490 We found that PBP2 positively limits processive Rod-complex activity, as demonstrated by  
491 nearly constant fractions of bound and persistently moving PBP2 molecules upon variations  
492 of PBP2 levels, and by high residual numbers of persistently moving PBP2 upon depletion of  
493 RodZ, MreCD, or RodA. These observations challenge the idea of a well-defined complex  
494 that requires the presence of all components for processive cell-wall-synthetic activity. RodA  
495 has been proposed as the major transglycosylase of the Rod complex (Emami et al., 2017;  
496 Meeske et al., 2016). Based on (Vigouroux et al., 2018), RodA levels were reduced more  
497 than 6-fold with respect to native levels in our experiments, while PAmCherry-PBP2 was  
498 overexpressed by two- to four-fold (Fig. 1–SI Fig. 1D). Yet, the number of persistently  
499 moving molecules per cell (bound fraction times persistent fraction) dropped by less than  
500 two-fold between wildtype and RodA repression. With a wild-type stoichiometry between  
501 RodA and PBP2 of about 1.4 (Li et al., 2014) there should thus have been less than one  
502 RodA molecule per moving PBP2 molecule. The high residual degree of persistent motion  
503 thus suggests that a different transglycosylase can be part of the active Rod complex, either  
504 a class-A PBP such as PBP1a (Banzhaf et al., 2012) or the SEDS protein FtsW (Taguchi et  
505 al., 2019).

506 Despite the substantial residual degree of persistent motion upon depletion of MreCD,  
507 RodA, or RodZ, the presence of all these components is required to stably maintain rod  
508 shape. A recent paper suggested that cell diameter in *E. coli* is determined by the spatial  
509 density of active Rod complexes (Dion et al., 2019). The model is compatible with the fold-  
510 change of persistently moving PBP2 molecules and cell-diameter changes observed during  
511 MreCD and RodZ depletion. However, during RodA-depletion this simple model does not  
512 apply: Due to overexpression of PBP2, the total number of persistently moving PBP2  
513 molecules per cell is as high as in the wildtype – even during RodA depletion. In the future, it  
514 will therefore be interesting to study how the stoichiometry of different Rod-complex  
515 components affects cell-wall insertion and cell shape.

## 516 **Acknowledgements**

517 We thank Timothy Lee and KC Huang for strain TKL130 and plasmid pKC128, Nikolay  
518 Ouzounov and Zemer Gitai for strains NO50 and NO53, Tom Bernhardt for strains  
519 TU230(attLHC943) and TU230(attLPR122), Felipe Bendezú and Piet de Boer for plasmids  
520 pFB121, pFB290 and strain FB60(iFB273). This work was supported by the European  
521 Research Council (ERC) under the Europe Union's Horizon 2020 research and innovation  
522 program [Grant Agreement No. (679980)], the French Government's Investissement d'Avenir  
523 program Laboratoire d'Excellence "Integrative Biology of Emerging Infectious Diseases"  
524 (ANR-10-LABX-62-IBEID), the Marie de Paris "Emergence(s)" program, the PRESTIGE  
525 Postdoc fellowship (Campus France), and the Volkswagen Foundation.



## 526 Bibliography

- 527 Alyahya, S.A., Alexander, R., Costa, T., Henriques, A.O., Emonet, T., and Jacobs-  
528 Wagner, C. (2009). RodZ, a component of the bacterial core morphogenic  
529 apparatus. *Proceedings of the National Academy of Sciences* 106, 1239–1244.
- 530 Banzhaf, M., van den Berg van Saparoea, B., Terrak, M., Fraipont, C., Egan, A.,  
531 Philippe, J., Zapun, A., Breukink, E., Nguyen-Disteche, M., den Blaauwen, T., et al.  
532 (2012). Cooperativity of peptidoglycan synthases active in bacterial cell elongation.  
533 *Molecular Microbiology* 85, 179–194.
- 534 Bendezú, F.O., Hale, C.A., Bernhardt, T.G., and de Boer, P.A.J. (2009). RodZ (YfgA)  
535 is required for proper assembly of the MreB actin cytoskeleton and cell shape in *E.*  
536 *coli*. *The EMBO Journal* 28, 193–204.
- 537 Bi, E., and Lutkenhaus, J. (1993). Cell division inhibitors SulA and MinCD prevent  
538 formation of the FtsZ ring. *J. Bacteriol.* 175, 1118–1125.
- 539 Billaudeau, C., Yao, Z., Cornilleau, C., Carballido-López, R., and Chastanet, A.  
540 (2019). MreB Forms Subdiffraction Nanofilaments during Active Growth in *Bacillus*  
541 *subtilis*. *MBio* 10, e01879-18.
- 542 Billings, G., Ouzounov, N., Ursell, T., Desmarais, S.M., Shaevitz, J., Gitai, Z., and  
543 Huang, K.C. (2014). De novomorphogenesis in L-forms via geometric control of cell  
544 growth. *Molecular Microbiology* 93, 883–896.
- 545 Bratton, B.P., Shaevitz, J.W., Gitai, Z., and Morgenstein, R.M. (2018). MreB  
546 polymers and curvature localization are enhanced by RodZ and predict *E. coli*' s  
547 cylindrical uniformity. *Nature Communications* 9, 2797.
- 548 Cho, H., Wivagg, C.N., Kapoor, M., Barry, Z., Rohs, P.D.A., Suh, H., Marto, J.A.,  
549 Garner, E.C., and Bernhardt, T.G. (2016). Bacterial cell wall biogenesis is mediated  
550 by SEDS and PBP polymerase families functioning semi-autonomously. *Nat.*  
551 *Microbiol* 1, 16172–16172.
- 552 Colavin, A., Shi, H., and Huang, K.C. (2018). RodZ modulates geometric localization  
553 of the bacterial actin MreB to regulate cell shape. *Nature Communications* 9, 1280.
- 554 Contreras-Martel, C., Martins, A., Ecobichon, C., Trindade, D.M., Matteï, P.-J.,  
555 Hicham, S., Hardouin, P., Ghachi, M.E., Boneca, I.G., and Dessen, A. (2017).  
556 Molecular architecture of the PBP2–MreC core bacterial cell wall synthesis complex.  
557 *Nature Communications* 8, 776.
- 558 Dion, M.F., Kapoor, M., Sun, Y., Wilson, S., Ryan, J., Vigouroux, A., Teeffelen, S.  
559 van, Oldenbourg, R., and Garner, E.C. (2019). *Bacillus subtilis* cell diameter is  
560 determined by the opposing actions of two distinct cell wall synthetic systems.  
561 *Nature Microbiology* 1.
- 562 Duvernoy, M.-C., Mora, T., Ardré, M., Croquette, V., Bensimon, D., Quilliet, C.,  
563 Ghigo, J.-M., Balland, M., Beloin, C., Lecuyer, S., et al. (2018). Asymmetric adhesion  
564 of rod-shaped bacteria controls microcolony morphogenesis. *Nature*  
565 *Communications* 9, 1120.

- 566 Dye, N.A., Pincus, Z., Theriot, J.A., Shapiro, L., and Gitai, Z. (2005). Two  
567 independent spiral structures control cell shape in *Caulobacter*. *Proc Natl Acad Sci*  
568 *USA* *102*, 18608–18613.
- 569 Emami, K., Guyet, A., Kawai, Y., Devi, J., Wu, L.J., Allenby, N., Daniel, R.A., and  
570 Errington, J. (2017). RodA as the missing glycosyltransferase in *Bacillus subtilis* and  
571 antibiotic discovery for the peptidoglycan polymerase pathway. *Nature Microbiology*  
572 *2*, 16253.
- 573 Errington, J. (2015). Bacterial morphogenesis and the enigmatic MreB helix. *Nature*  
574 *Reviews Microbiology* *13*, 241–248.
- 575 Gitai, Z. (2005). The new bacterial cell biology: moving parts and subcellular  
576 architecture. *Cell* *120*, 577–586.
- 577 Harris, L.K., Dye, N.A., and Theriot, J.A. (2014). A *Caulobacter* MreB mutant with  
578 irregular cell shape exhibits compensatory widening to maintain a preferred surface  
579 area to volume ratio. *Molecular Microbiology* *94*, 988–1005.
- 580 Hocking, J., Priyadarshini, R., Takacs, C.N., Costa, T., Dye, N.A., Shapiro, L.,  
581 Vollmer, W., and Jacobs-Wagner, C. (2012). Osmolality-dependent relocation of  
582 penicillin-binding protein PBP2 to the division site in *Caulobacter crescentus*. *Journal*  
583 *of Bacteriology* *194*, 3116–3127.
- 584 Höltje, J.V. (1998). Growth of the stress-bearing and shape-maintaining murein  
585 sacculus of *Escherichia coli*. *Microbiology and Molecular Biology Reviews* *62*, 181–  
586 203.
- 587 Hussain, S., Wivagg, C.N., Szwedziak, P., Wong, F., Schaefer, K., Izoré, T., Renner,  
588 L.D., Holmes, M.J., Sun, Y., Bisson-Filho, A.W., et al. (2018). MreB filaments align  
589 along greatest principal membrane curvature to orient cell wall synthesis. *ELife*  
590 *Sciences* *7*, e32471.
- 591 Kawazura, T., Matsumoto, K., Kojima, K., Kato, F., Kanai, T., Niki, H., and Shiomi, D.  
592 (2017). Exclusion of assembled MreB by anionic phospholipids at cell poles confers  
593 cell polarity for bidirectional growth. *Molecular Microbiology* *104*, 472–486.
- 594 Kruse, T., Bork-Jensen, J., and Gerdes, K. (2004). The morphogenetic MreBCD  
595 proteins of *Escherichia coli* form an essential membrane-bound complex. *Molecular*  
596 *Microbiology* *55*, 78–89.
- 597 Kumar, M., Mommer, M.S., and Sourjik, V. (2010). Mobility of Cytoplasmic,  
598 Membrane, and DNA-Binding Proteins in *Escherichia coli*. *Biophysical Journal* *98*,  
599 552–559.
- 600 Lee, T.K., Tropini, C., Hsin, J., Desmarais, S.M., Ursell, T.S., Gong, E., Gitai, Z.,  
601 Monds, R.D., and Huang, K.C. (2014). A dynamically assembled cell wall synthesis  
602 machinery buffers cell growth. *Proceedings of the National Academy of Sciences*  
603 *111*, 4554–4559.
- 604 Li, G.-W., Burkhardt, D., Gross, C., and Weissman, J.S. (2014). Quantifying Absolute  
605 Protein Synthesis Rates Reveals Principles Underlying Allocation of Cellular  
606 Resources. *Cell* *157*, 624–635.

- 607 Manley, S., Gillette, J.M., Patterson, G.H., Shroff, H., Hess, H.F., Betzig, E., and  
608 Lippincott-Schwartz, J. (2008). High-density mapping of single-molecule trajectories  
609 with photoactivated localization microscopy. *Nature Methods* 5, 155–157.
- 610 Meeske, A.J., Riley, E.P., Robins, W.P., Uehara, T., Mekalanos, J.J., Kahne, D.,  
611 Walker, S., Kruse, A.C., Bernhardt, T.G., and Rudner, D.Z. (2016). SEDS proteins  
612 are a widespread family of bacterial cell wall polymerases. *Nature* 537, 634–638.
- 613 Morgenstein, R.M., Bratton, B.P., Nguyen, J.P., Ouzounov, N., Shaevitz, J.W., and  
614 Gitai, Z. (2015). RodZ links MreB to cell wall synthesis to mediate MreB rotation and  
615 robust morphogenesis. *Proceedings of the National Academy of Sciences* 112,  
616 12510–12515.
- 617 Nguyen, L.T., Gumbart, J.C., Beeby, M., and Jensen, G.J. (2015). Coarse-grained  
618 simulations of bacterial cell wall growth reveal that local coordination alone can be  
619 sufficient to maintain rod shape. *Proceedings of the National Academy of Sciences*  
620 112, E3689–E3698.
- 621 Olshausen, P. v, Defeu Soufo, H.J., Wicker, K., Heintzmann, R., Graumann, P.L.,  
622 and Rohrbach, A. (2013). Superresolution Imaging of Dynamic MreB Filaments in  
623 *B. subtilis*—A Multiple-Motor-Driven Transport? *Biophysical Journal* 105, 1171–1181.
- 624 Ouzounov, N., Nguyen, J.P., Bratton, B.P., Jacobowitz, D., Gitai, Z., and Shaevitz,  
625 J.W. (2016). MreB Orientation Correlates with Cell Diameter in *Escherichia coli*.  
626 *Biophysical Journal* 111, 1035–1043.
- 627 Rohs, P.D.A., Buss, J., Sim, S.I., Squyres, G.R., Srisuknimit, V., Smith, M., Cho, H.,  
628 Sjodt, M., Kruse, A.C., Garner, E.C., et al. (2018). A central role for PBP2 in the  
629 activation of peptidoglycan polymerization by the bacterial cell elongation machinery.  
630 *PLOS Genetics* 14, e1007726.
- 631 Salje, J., van den Ent, F., de Boer, P., and Löwe, J. (2011). Direct Membrane  
632 Binding by Bacterial Actin MreB. *Molecular Cell* 43, 478–487.
- 633 Shi, H., Bratton, B.P., Gitai, Z., and Huang, K.C. (2018). How to Build a Bacterial  
634 Cell: MreB as the Foreman of *E. coli* Construction. *Cell* 172, 1294–1305.
- 635 Shiomi, D., Sakai, M., and Niki, H. (2008). Determination of bacterial rod shape by a  
636 novel cytoskeletal membrane protein. *The EMBO Journal* 27, 3081–3091.
- 637 Spratt, B.G. (1975). Distinct penicillin binding proteins involved in the division,  
638 elongation, and shape of *Escherichia coli* K12. *Proc Natl Acad Sci USA* 72, 2999–  
639 3003.
- 640 Strahl, H., Bürmann, F., and Hamoen, L.W. (2014). The actin homologue MreB  
641 organizes the bacterial cell membrane. *Nat Commun* 5, 3442–3442.
- 642 Surovtsev, I.V., and Jacobs-Wagner, C. (2018). Subcellular Organization: A Critical  
643 Feature of Bacterial Cell Replication. *Cell* 172, 1271–1293.
- 644 Taguchi, A., Welsh, M.A., Marmont, L.S., Lee, W., Sjodt, M., Kruse, A.C., Kahne, D.,  
645 Bernhardt, T.G., and Walker, S. (2019). FtsW is a peptidoglycan polymerase that is  
646 functional only in complex with its cognate penicillin-binding protein. *Nature*  
647 *Microbiology* 4, 587–594.

- 648 van Teeffelen, S., Wang, S., Furchtgott, L., Huang, K.C., Wingreen, N.S., Shaevitz,  
649 J.W., and Gitai, Z. (2011). The bacterial actin MreB rotates, and rotation depends on  
650 cell-wall assembly. *Proceedings of the National Academy of Sciences* *108*, 15822–  
651 15827.
- 652 Turner, R.D., Mesnage, S., Hobbs, J.K., and Foster, S.J. (2018). Molecular imaging  
653 of glycan chains couples cell-wall polysaccharide architecture to bacterial cell  
654 morphology. *Nature Communications* *9*, 1263.
- 655 Typas, A., Banzhaf, M., Gross, C.A., and Vollmer, W. (2012). From the regulation of  
656 peptidoglycan synthesis to bacterial growth and morphology. *Nat Rev Microbiol* *10*,  
657 123–136.
- 658 Uehara, T., and Park, J.T. (2008). Growth of *Escherichia coli*: Significance of  
659 Peptidoglycan Degradation during Elongation and Septation. *Journal of Bacteriology*  
660 *190*, 3914–3922.
- 661 Ursell, T., Lee, T.K., Shiomi, D., Shi, H., Tropini, C., Monds, R.D., Colavin, A.,  
662 Billings, G., Bhaya-Grossman, I., Broxton, M., et al. (2017). Rapid, precise  
663 quantification of bacterial cellular dimensions across a genomic-scale knockout  
664 library. *BMC Biology* *15*, 17.
- 665 Ursell, T.S., Nguyen, J., Monds, R.D., Colavin, A., Billings, G., Ouzounov, N., Gitai,  
666 Z., Shaevitz, J.W., and Huang, K.C. (2014). Rod-like bacterial shape is maintained  
667 by feedback between cell curvature and cytoskeletal localization. *Proceedings of the*  
668 *National Academy of Sciences* *111*, E1025-34.
- 669 Vigouroux, A., Oldewurtel, E., Cui, L., Bikard, D., and Teeffelen, S. van (2018).  
670 Tuning dCas9's ability to block transcription enables robust, noiseless knockdown of  
671 bacterial genes. *Molecular Systems Biology* *14*, e7899.
- 672 Vollmer, W., Blanot, D., and de Pedro, M.A. (2008). Peptidoglycan structure and  
673 architecture. *FEMS Microbiol Rev* *32*, 149–167.
- 674 Wang, S., and Wingreen, N.S. (2013). Cell shape can mediate the spatial  
675 organization of the bacterial cytoskeleton. *Biophysical Journal* *104*, 541–552.
- 676 Wang, S., Furchtgott, L., Huang, K.C., and Shaevitz, J.W. (2012). Helical insertion of  
677 peptidoglycan produces chiral ordering of the bacterial cell wall. *Proceedings of the*  
678 *National Academy of Sciences* *109*, E595-604.
- 679 Wong, F., Renner, L.D., Özbaykal, G., Paulose, J., Weibel, D.B., Teeffelen, S. van,  
680 and Amir, A. (2017). Mechanical strain sensing implicated in cell shape recovery in  
681 *Escherichia coli*. *Nature Microbiology* *2*, 17115.
- 682 Wong, F., Garner, E.C., and Amir, A. (2019). Mechanics and dynamics of  
683 translocating MreB filaments on curved membranes. *ELife* *8*, e40472.
- 684

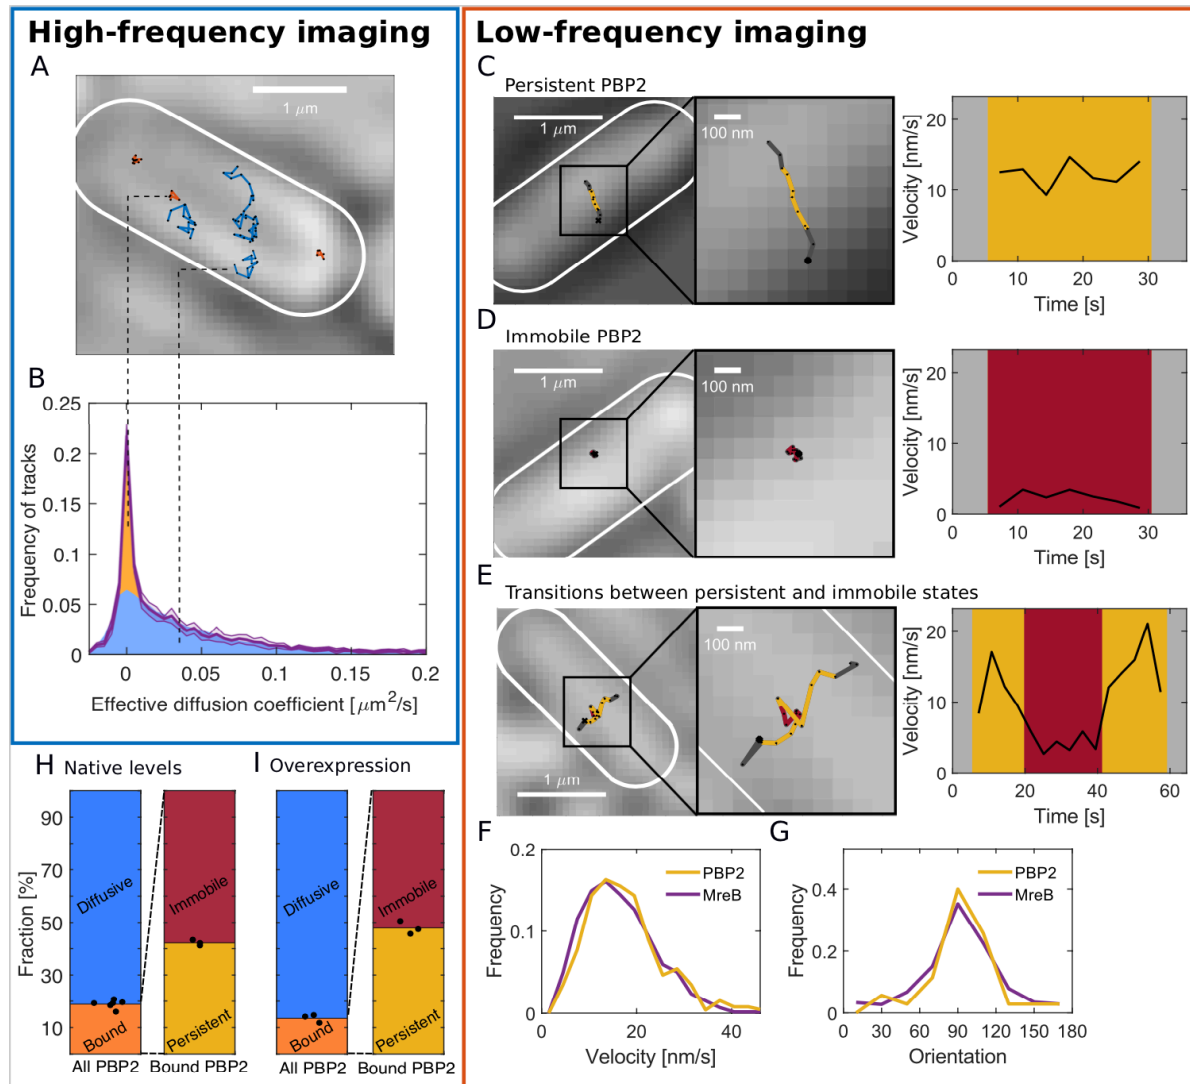

**Figure 1. PBP2 molecules reside in diffusive, immobile, or persistently moving states.**

**(A)** Representative trajectories of PAmCherry-PBP2 molecules (TKL130) obtained by high-frequency imaging (time interval 60 ms) reveals diffusive (blue) and bound (orange) molecules.

**(B)** Probability distribution of single-molecule effective diffusion coefficients (purple) and fit to a two-state diffusion model. 81% of PBP2 move diffusively with  $D = 0.039 \mu\text{m}^2/\text{s}$  (blue region) while 19% are immobile (orange region). The shaded area in magenta indicates standard deviation between replicates.

**(C-E)** Low-frequency imaging (3.6 s with 1 s exposure time) reveals that bound PBP2 molecules are either persistently moving **(C)** or immobile **(D)**, according to the instantaneous PBP2 velocity. PBP2 molecules show transitions between persistent and immobile states **(E)**.

**(F-G)** Persistently moving PBP2 and MreB filaments show similar speeds **(F)** and orientations of motion (orientation measured with respect to the cell centerline) **(G)**.

**(H-I)** Average fractions of bound, diffusive, persistently moving, and immobile PAmCherry-PBP2 at native levels (TKL130) **(H)** or if overexpressed (TKL130/pKC128) **(I)**. Dots show biological replicates.

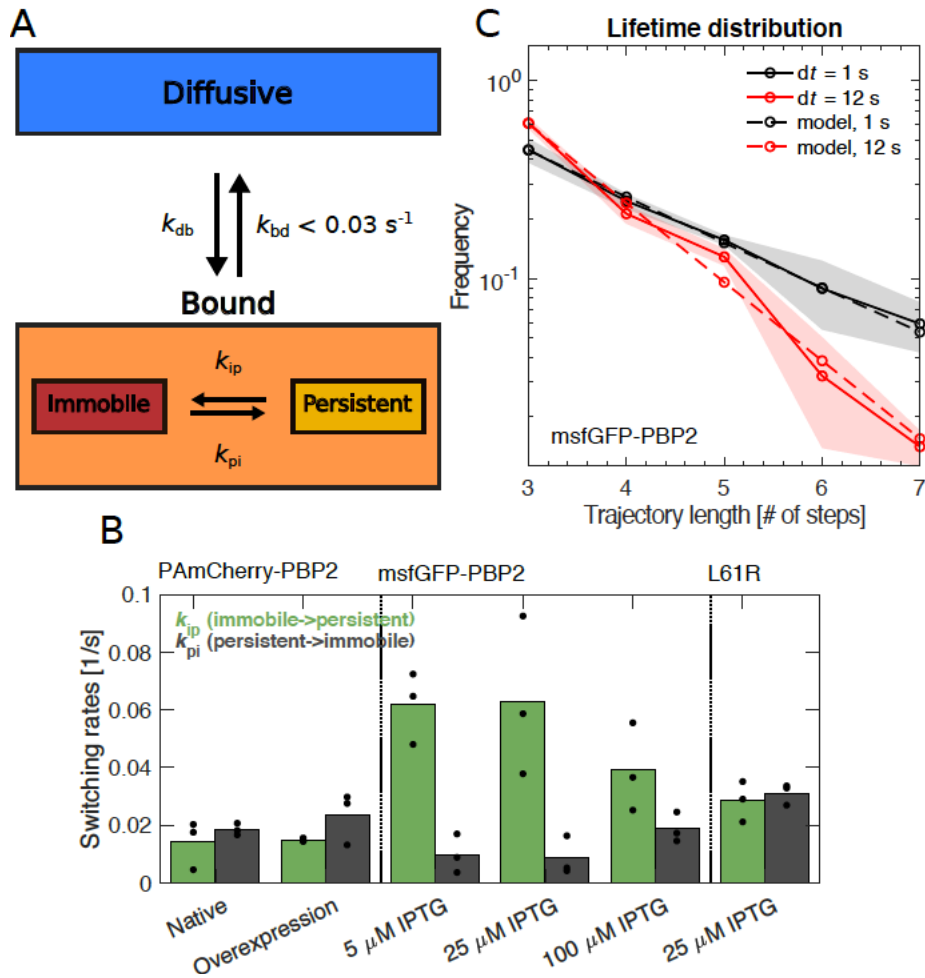

**Figure 2. PBP2 molecules transition between different dynamic states.**

**(A)** Diagram illustrating transition rates measured between different motion states.

**(B)** Transition rates between immobile and persistently moving states for different protein fusions and expression levels. Circles: biological replicates.

**(C)** Fluorescence-lifetime distributions of msfGFP-PBP2 trajectories with imaging intervals of 1 s (black solid line) and 12 s (red solid line). Dashed lines represent a joint fit of the two curves to a model of photobleaching and bleaching-independent track termination, the latter comprising unbinding and persistently molecules leaving the TIR field of view (bleaching probability per frame  $p_b = 0.39 \pm 0.08$ , apparent track termination rate  $k_a = 0.035 \pm 0.007 \text{ s}^{-1}$ ). Based on a model for persistent motion, we obtained an upper limit of the unbinding rate of  $k_{bd} < 0.03/\text{s}$  (Fig. 2–SI Fig. 1). Shaded region: Standard deviation between replicates.

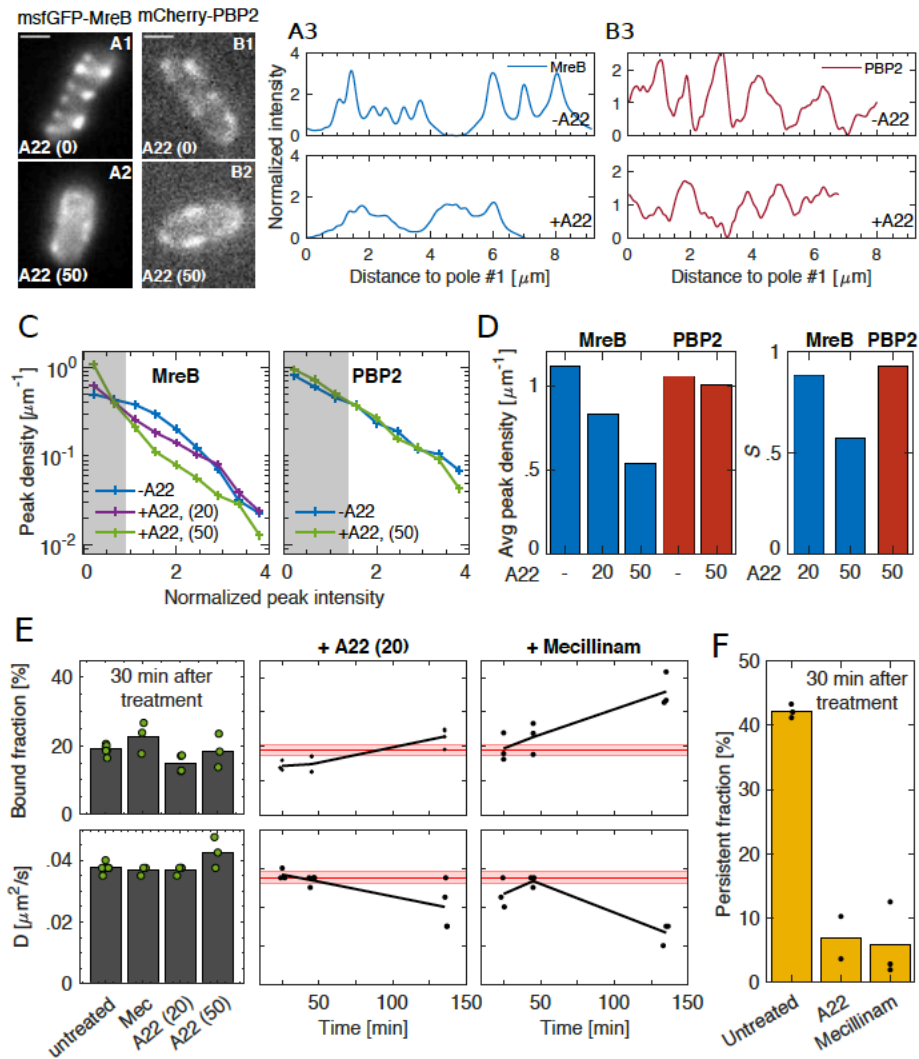

**Figure 3. Spatial distribution and magnitude of PBP2 bound fraction are independent of MreB cytoskeleton.**

**(A-B)** A22 (30 min; 50  $\mu\text{g/ml}$ ) visibly reduces peak number and intensity of MreB-msfGFP **(A)** but not of mCherry-PBP2 **(B)** on cell boundaries (image exposure time 1 s). Scale bar 1  $\mu\text{m}$ .

**(C)** Peak density on the cell boundary [ $1/\mu\text{m}$ ] as function of peak intensity for two A22 concentrations (20, 50  $\mu\text{g/ml}$ ). Intensities are normalized by median peak intensity in untreated cells. Gray regions: peaks within noise floor.

**(D) Left.** Density of all peaks above noise floor in **(A)**. **Right.** Fold-change  $S$  of the amount of molecules found inside peaks between untreated and A22-treated conditions.

**(E) Left.** Bound fraction and diffusion constant of PAmCherry-PBP2 30 minutes after drug treatment with mecillinam (labeled 'Mec', 100  $\mu\text{g/ml}$ ) or A22 (20 or 50  $\mu\text{g/ml}$ ). **Right.** Bound fraction and diffusion constant over time after treatment with A22 (20  $\mu\text{g/ml}$ ) or mecillinam (100  $\mu\text{g/ml}$ ). Dots indicate biological replicates. Red lines and shaded areas: Average values and standard deviations between replicates from untreated cells.

**(F)** Persistent fractions corresponding to the 30 min time point in **(E)**.

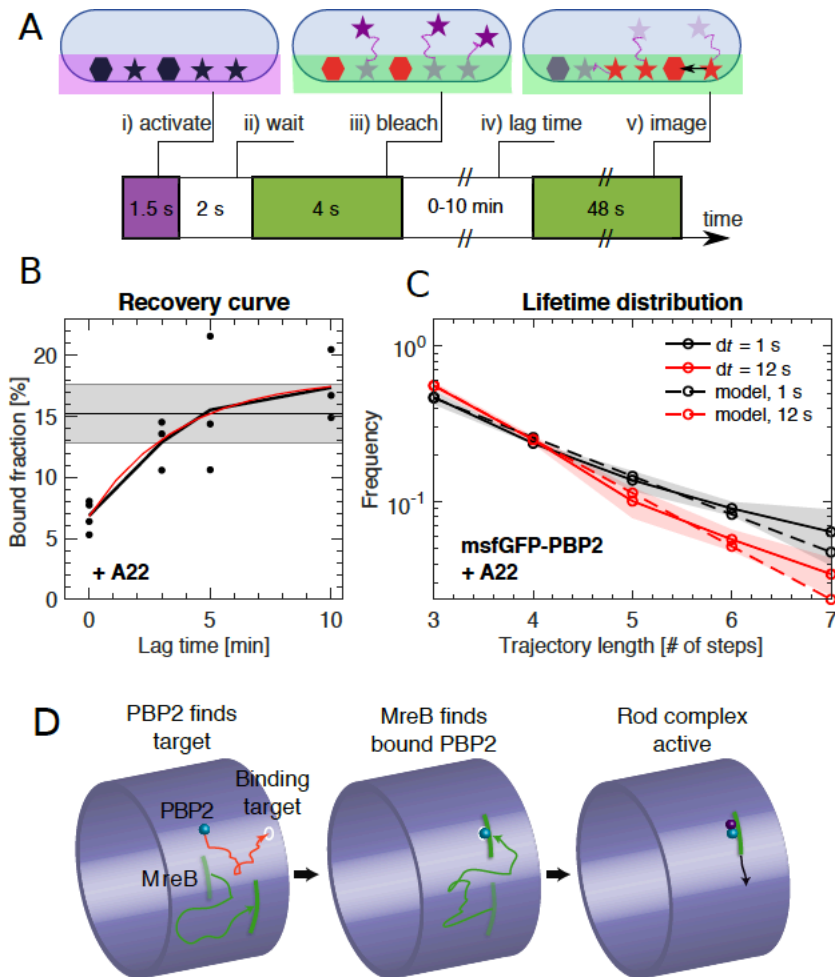

**Figure 4. PBP2 slowly transitions between diffusive and bound states.**

**(A)** Bound-Molecule-FRAP reveals rate of PAmCherry-PBP2 binding  $k_{db}$ : i) Diffusive (stars) and bound (hexagons) molecules are activated at bottom of cell through TIR illumination. ii) Most activated diffusive molecules (purple) leave the field of view. iii) Remaining molecules are bleached (red). iv) Activated diffusive molecules partially return into the field of view, where they can bind (black arrow). v) Measurement of bound fraction.

**(B)** Bound fraction according to (A) at different lag times. Black horizontal line and shaded area: bound fraction without bleaching and standard deviation from replicates. An exponential fit in the form  $b(t) = a_1 - a_2 \exp[-k_{db} t]$  (red line) yields binding rate  $k_{db} = (4.5 \pm 2) \cdot 10^{-3} \text{ s}^{-1}$ .

**(C)** Fluorescence-lifetime distributions of msfGFP-PBP2 tracks in A22-treated cells with imaging intervals of 1 s (black solid line) and 12 s (red solid line) yields unbinding rate  $k_{bd} = 0.02 \pm 0.01 \text{ s}^{-1}$ .

**(D)** Cartoon of suggested Rod-complex initiation through PBP2: PBP2 (blue) binds to a target site in the cell envelope (white circle) independently of MreB filaments or PBP2 activity. PBP2 then recruits an MreB filament through diffusion and capture (green) or through nucleation, and also recruits other rod-complex components (magenta).



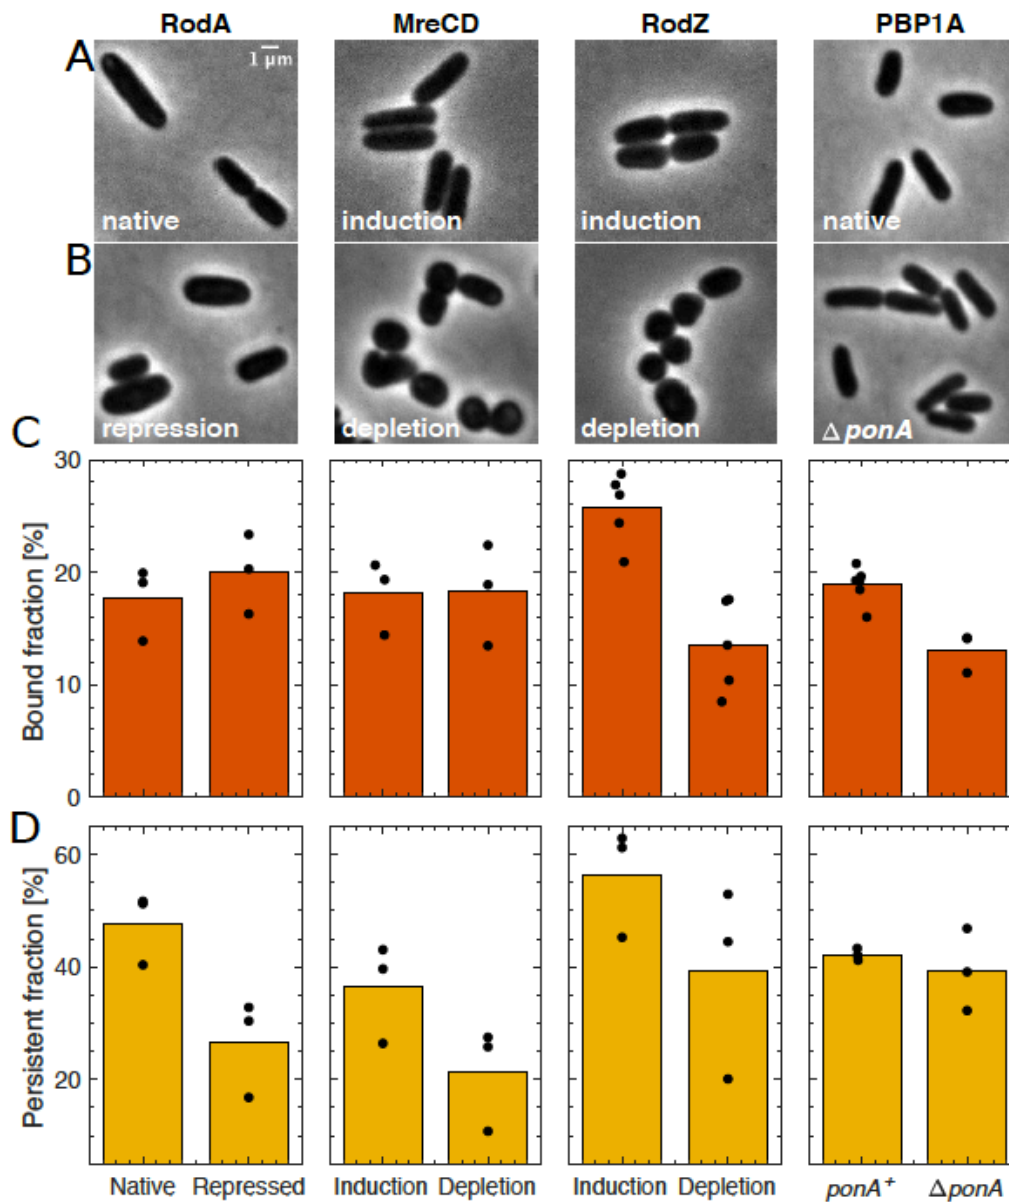

**Figure 5. Depletion of known rod-complex components only weakly affects PBP2 binding.**

**(A-B)** Cell shape upon near-native expression **(A)** or long-time depletion **(B)** of RodA, MreCD, RodZ, or PBP1a. RodA was repressed for 9h through CRISPRi against *mrdAB* operon (coding for PBP2 and RodA) in AV48/pKC128 [ $P_{mrdA}::PAmCherry-PBP2$ ]. Here, PBP2 was 2-5-fold overexpressed from plasmid pKC128 to avoid PBP2 depletion upon *mrdAB* repression. MreCD was depleted for 6h in TKL130  $\Delta mreCD$ /pFB121 [ $P_{lac}::mreCD$ ]. RodZ was depleted for 6h in TKL130  $\Delta rodZ$ /pFB290 [ $P_{lac}::rodZ$ ]. PBP1a is not essential and was deleted. In all cases except for PBP1A, cells lose rod-like cell shape.

**(C-D)** Bound fractions **(C)** and persistent fractions **(D)** of PAmCherry-PBP2 upon expression or depletion of proteins indicated above **(A)**.

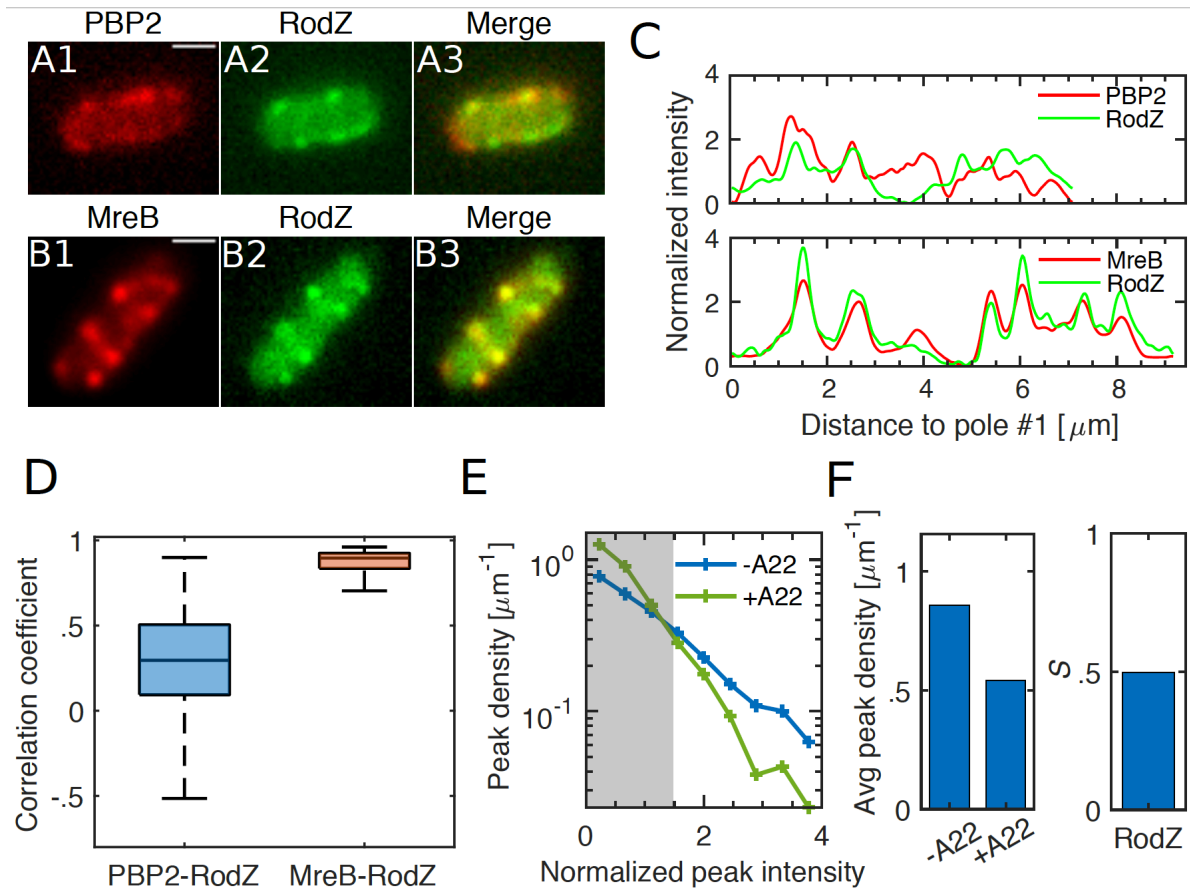

**Figure 6. PBP2 localization does not depend on RodZ, and RodZ depends on MreB.**

**(A-B)** Fluorescence images of cells co-expressing mCherry-PBP2 and GFP-RodZ ( $\Delta rodZ$   $mrdA \leftrightarrow mCherry-mrdA$  ( $P_{lac}::gfp-rodZ$ )) **(A)** or MreB-mCherry and GFP-RodZ ( $\Delta rodZ$   $mreB \leftrightarrow mreB-mCherry$  ( $P_{lac}::gfp-rodZ$ )) **(B)**

**(C)** Fluorescence signals along contours of cells displayed in (A) (mCherry-PBP2, GFP-RodZ) and (C) (MreB-mCherry, GFP-RodZ).

**(D)** Pearson correlation coefficients between PBP2- and RodZ signals (left) and between MreB- and RodZ signals (right).

**(E-F)** Localization pattern of GFP-RodZ (expressed as sole fusion and sole copy of RodZ in wt  $\Delta rodZ$  ( $P_{lac}::gfp-rodZ$ )) upon A22 treatment analyzed as in Fig. 3C-D. **(E)** Peak density on the cell boundary as a function of peak intensity. **(F) Left:** Density of all peaks above noise floor in (E). **Right:** The fold-change  $S$  of the amount of molecules found inside peaks between untreated and A22-treated conditions. GFP-RodZ behaves as MreB-msfGFP and differently from mCherry-PBP2 (Fig. 3C-D).

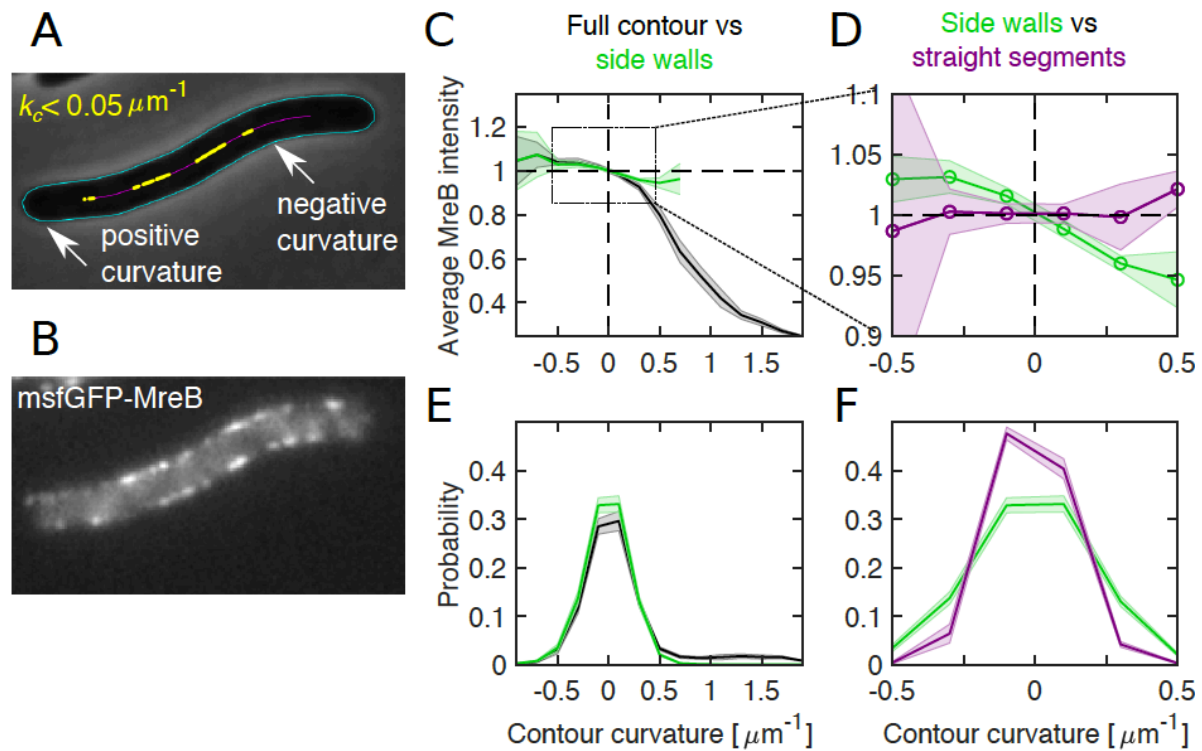

**Figure 7. Differential MreB-curvature correlations in filamentous cells are due to cell poles and cell bending.**

**(A-B)** Phase-contrast image **(A)** and fluorescence intensity **(B)** of a representative filamentous *E. coli* expressing MreB-msfGFP and SulA (NO53/pDB192). Contours (cyan) are obtained by computational cell segmentation. Positive contour curvature is found at cell poles, bulges, and outer parts of spontaneously bent regions, while negative curvature is found at indentations and inner parts of bent regions. Straight cell segments (yellow) are defined as regions where the curvature of the spatially averaged centerline (magenta) is smaller than  $0.05 \mu\text{m}^{-1}$ .

**(C-D)** Normalized average MreB intensity as a function of local contour curvature. Comparison between correlations obtained from full contours (black) and side walls (green) **(C)** and from side walls (green) and straight cell segments (magenta) **(D)**.

**(E-F)** Distributions of contour-curvature values corresponding to correlation plots in (C-D). Shaded region: Standard deviation between replicates.

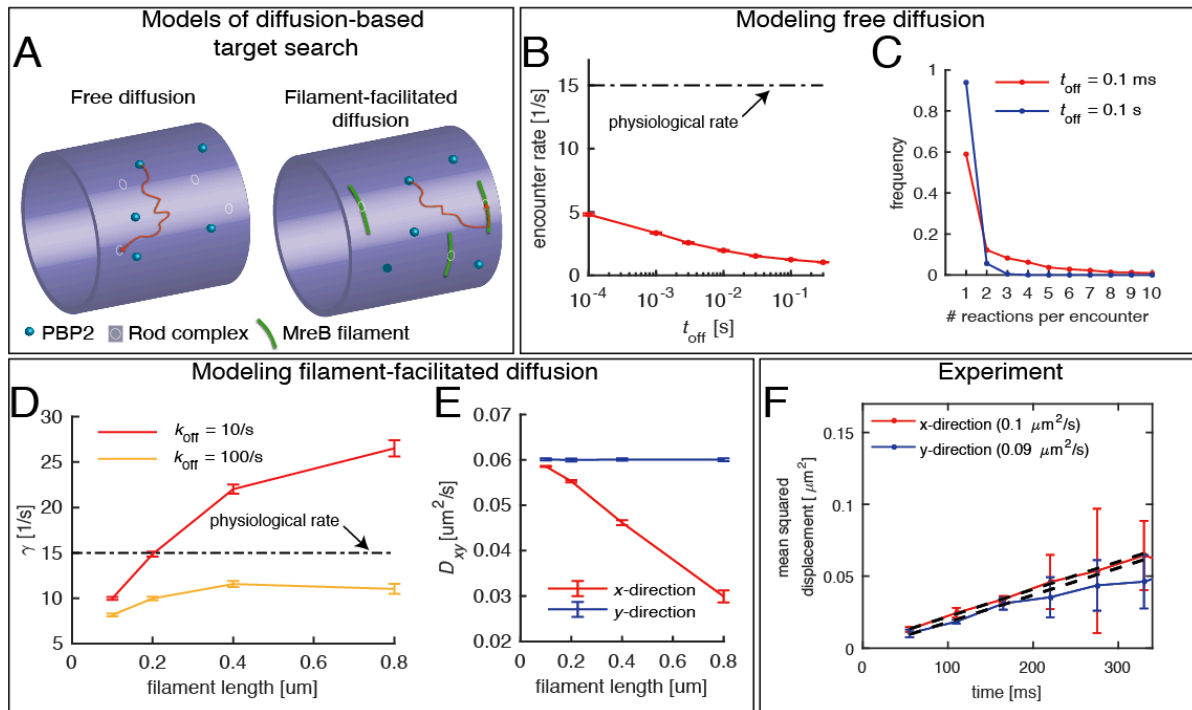

**Figure 8. Testing a possible role of diffusive PBP2 for cross-linking.**

**(A)** Cartoon of PBP2 finding the target site of a 'rod complex' through free diffusion (left) or filament-facilitated diffusion (right).

**(B)** The average encounter rate between any of 100 freely diffusing PBP2 molecules and a given rod-complex site as a function of the unknown latency time  $t_{\text{off}}$  (the duration for which a single PBP2 enzyme is inactive after a cross-linking reaction) (red) in comparison to the physiological cross-linking rate (dashed-dotted line) **(C)** Distribution of the number of successive cross-linking reactions conducted by the same PBP2 molecule at the same rod-complex site for two different latency times.

**(D-E)** Facilitated diffusion along circumferentially oriented filaments centered at every rod-complex site increases the encounter rate **(D)** and renders diffusion asymmetric **(E)**.

**(F)** Diffusion of PAmCherry-PBP2 is not asymmetric at short time scales, suggesting that PBP2 does not undergo facilitated diffusion along filaments.
